# Supplementary material for: Relationship between intersectionality and cancer inequalities: a scoping review protocol
Source: HighWire-hosted journal article supplement (doi:10.1136/bmjopen-2022-066637), 2023-01-01
Supplement: bmjopen-2022-066637supp001_data_supplement.pdf [file bmjopen-2022-066637supp001_data_supplement.pdf]

Supplemental Table 1. PRISMA flowchart

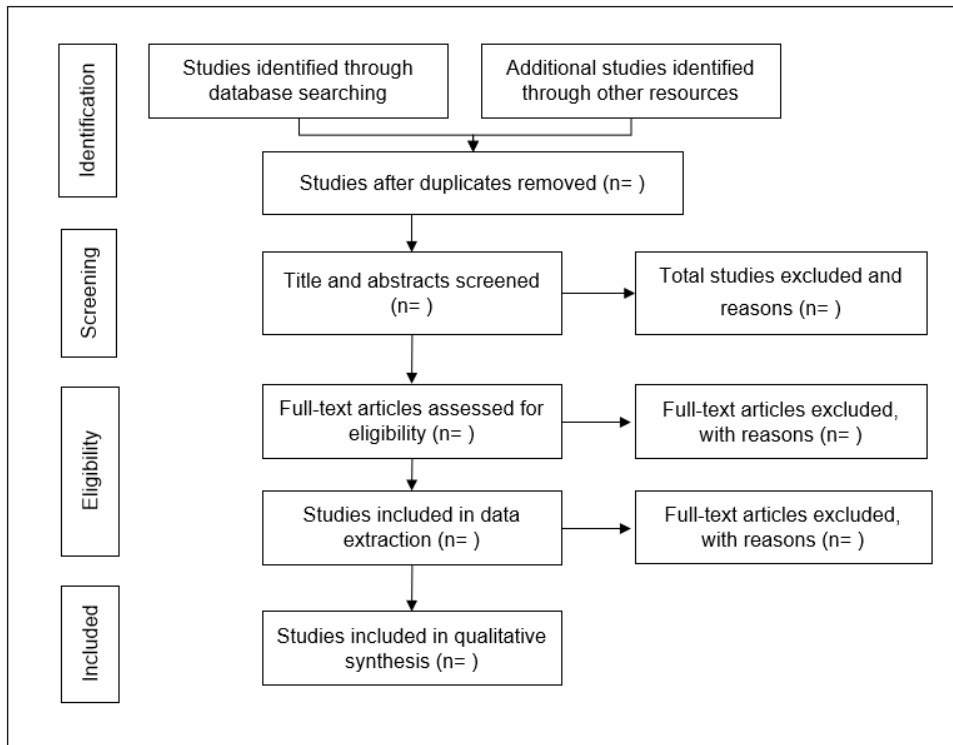

**Supplemental Table 2. Example of Search strategy**

| Search ID# | Key Term          | Medline search string                                                                                                                                                                                               |
|------------|-------------------|---------------------------------------------------------------------------------------------------------------------------------------------------------------------------------------------------------------------|
| S1         | Cancer            | [TI:AB] (cancer* OR carcinoma* OR neoplas* OR tumor* OR tumour* OR malignan* OR hodgkin* OR nonhodgkin* OR adenocarcinoma* OR leukemia* OR metasta* OR lymphoma* OR sarcoma* OR melanoma* OR myeloma* OR oncolog* ) |
| S2         | Intersectionality | [TX] Intersect* OR Power OR Marginali* OR Oppress* OR Discrim*                                                                                                                                                      |
| S3         | Inequalities      | [TI:AB] (disparit* OR inequit* OR inequalit* OR disadvantag* )                                                                                                                                                      |
| S4         |                   | #1 AND #2 AND #3                                                                                                                                                                                                    |
